# Supplementary material
Source: PubMed Central journal article supplement (PMC3444632)

Figure S1.

**pAkt<sup>Thr308</sup>**

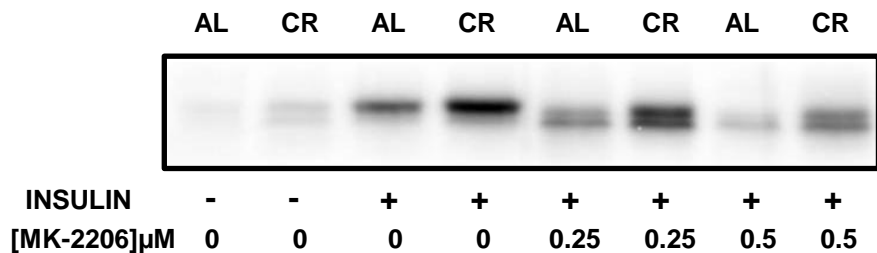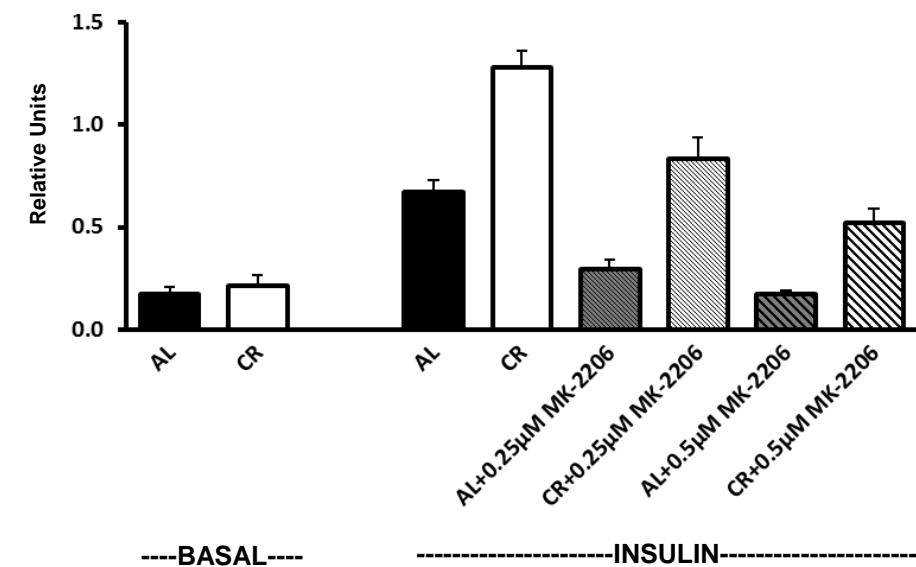

**pAkt2<sup>Thr308</sup>**

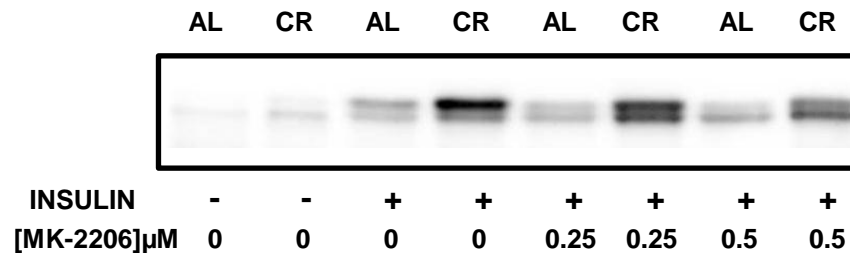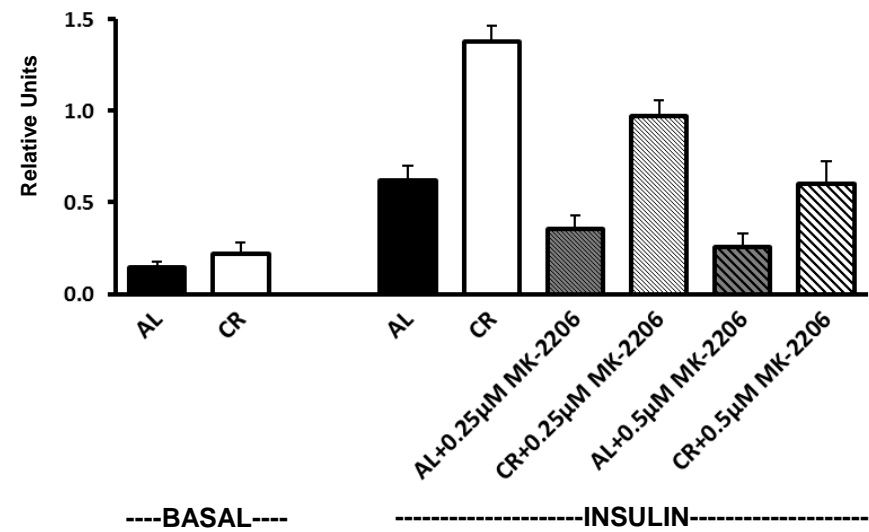

Supplement: NIHMS398102-supplement-01.pdf [file NIHMS398102-supplement-01.pdf]

Figure S2.

# pAS160<sup>Thr642</sup>

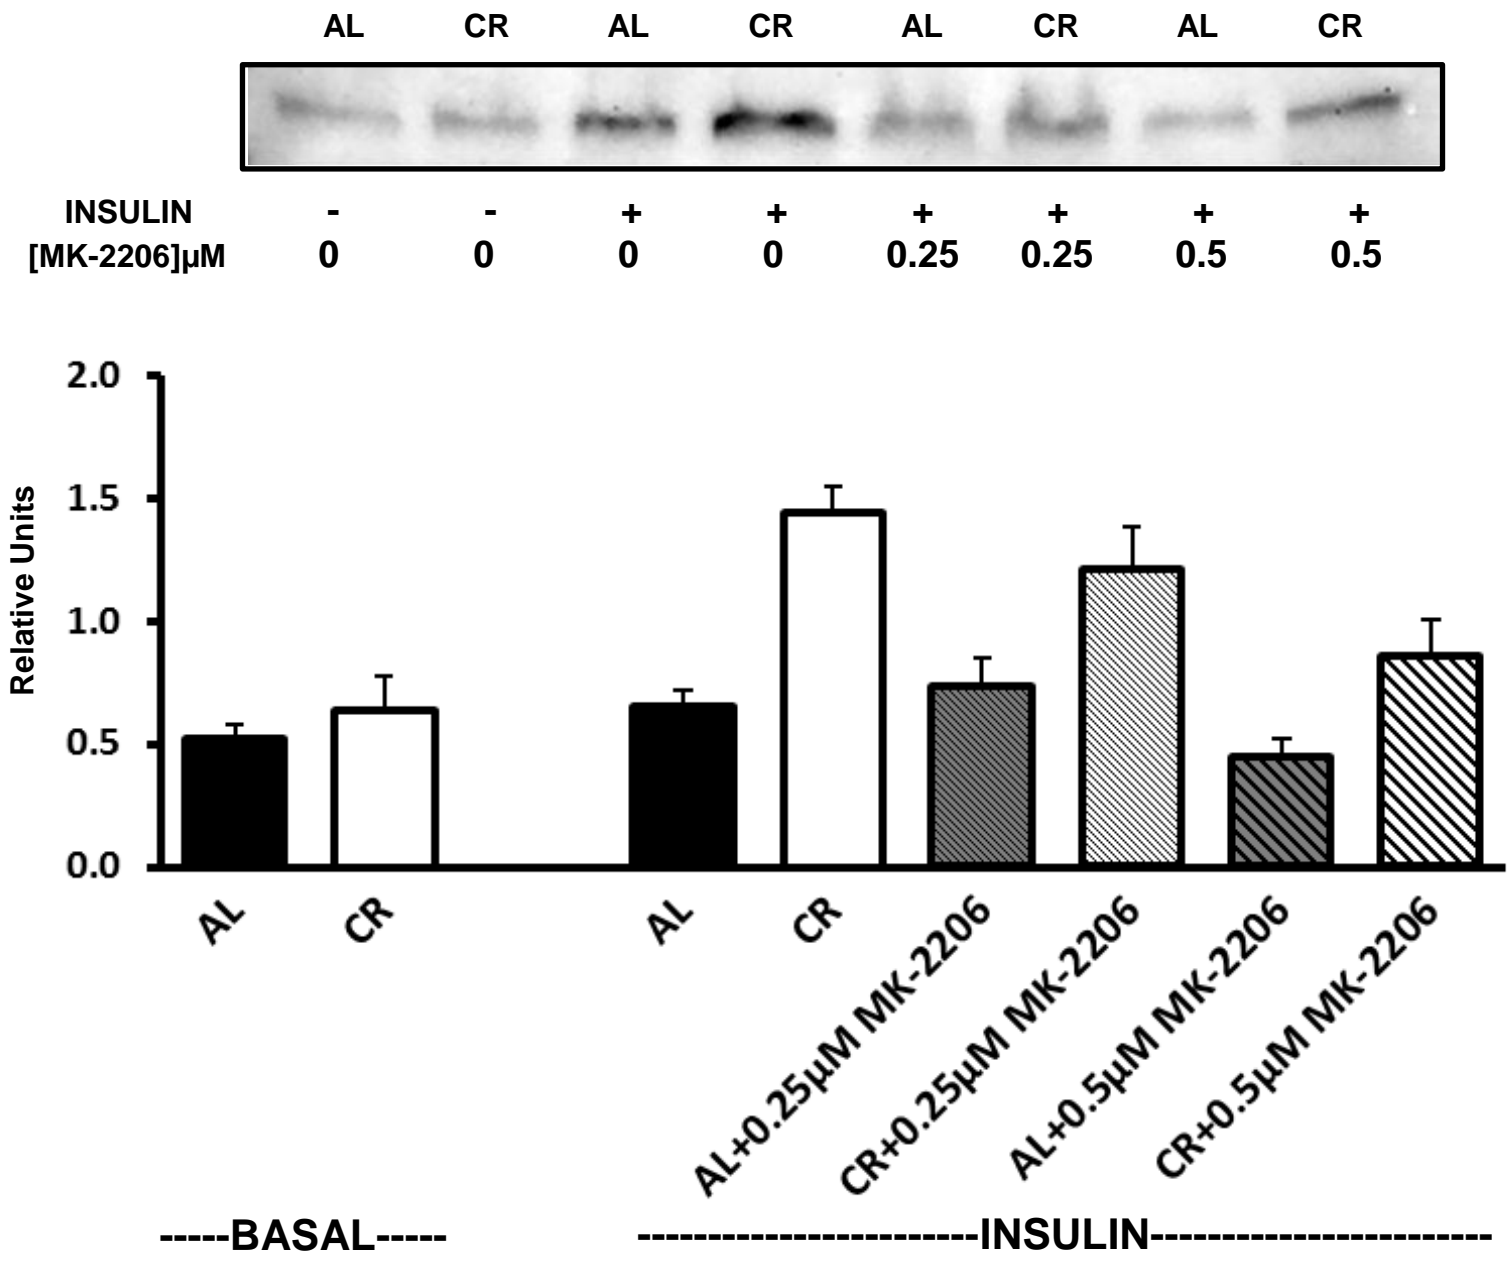

Supplement: NIHMS398102-supplement-02.pdf [file NIHMS398102-supplement-02.pdf]

Figure S3.

# pFilamin C Ser2213

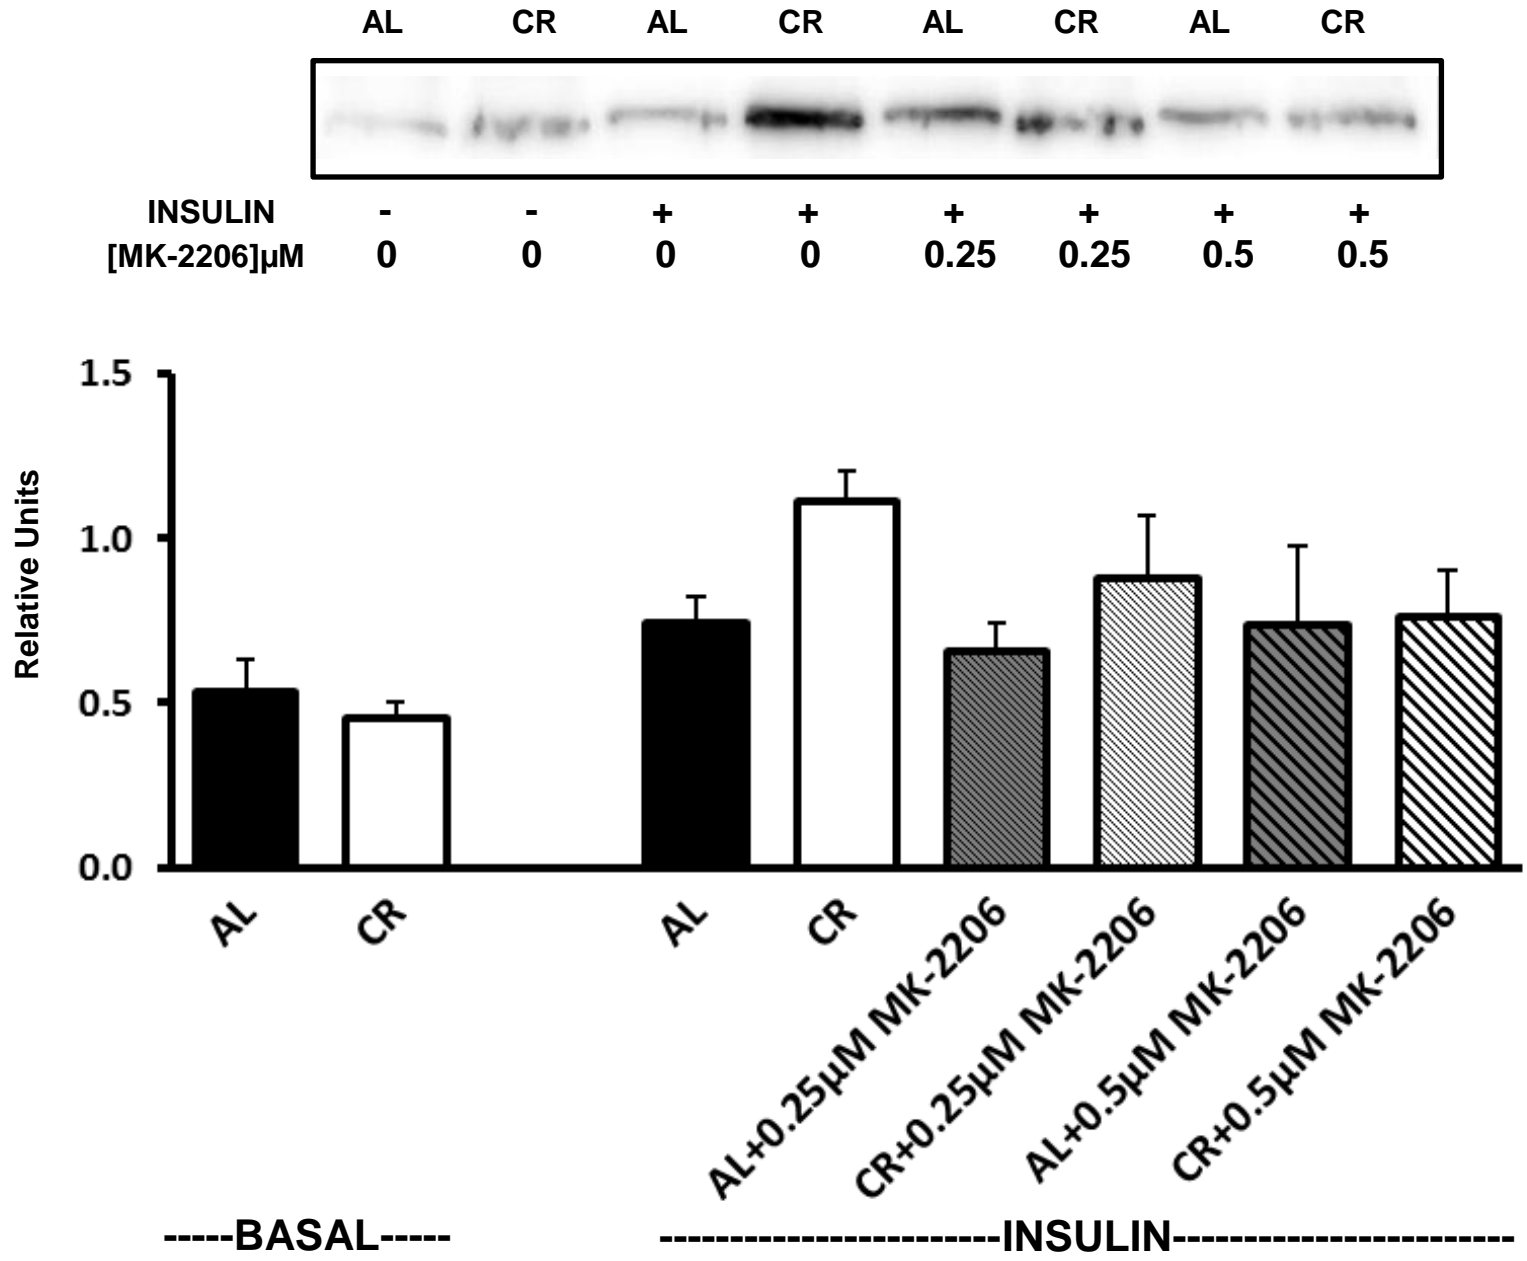

Supplement: NIHMS398102-supplement-03.pdf [file NIHMS398102-supplement-03.pdf]

Figure S4.

### pAkt<sup>Ser473</sup>

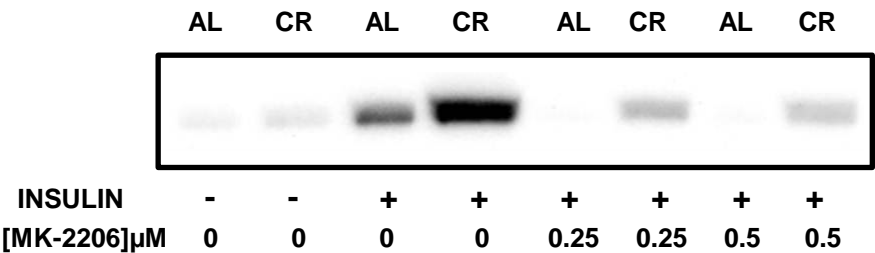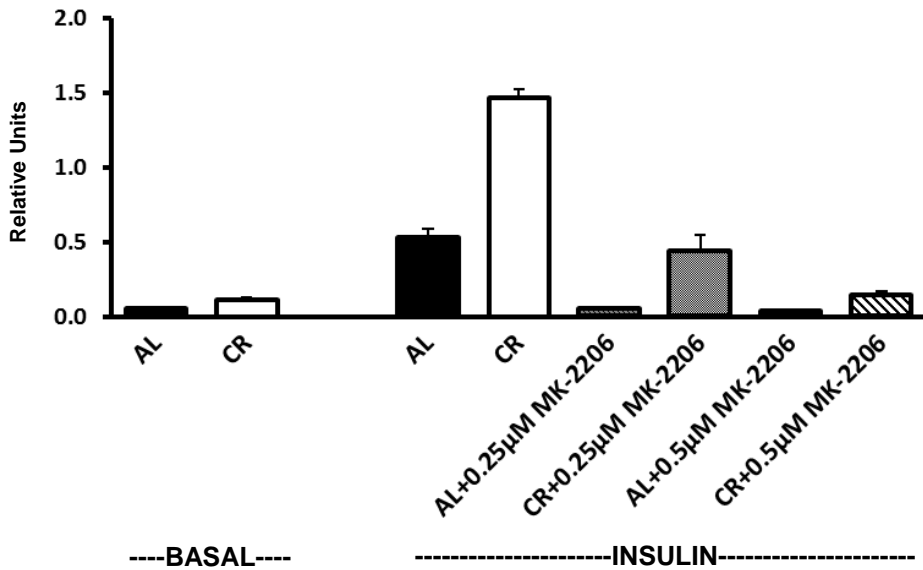

### pAkt2<sup>Ser473</sup>

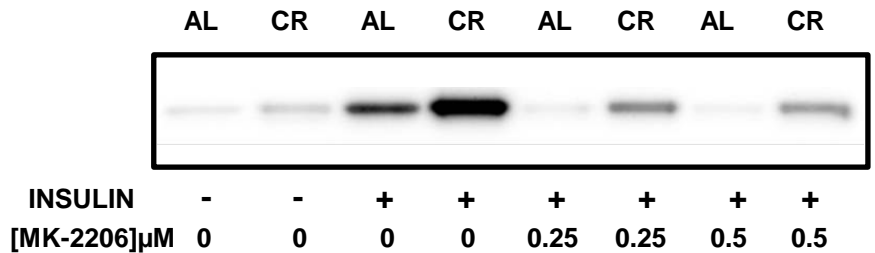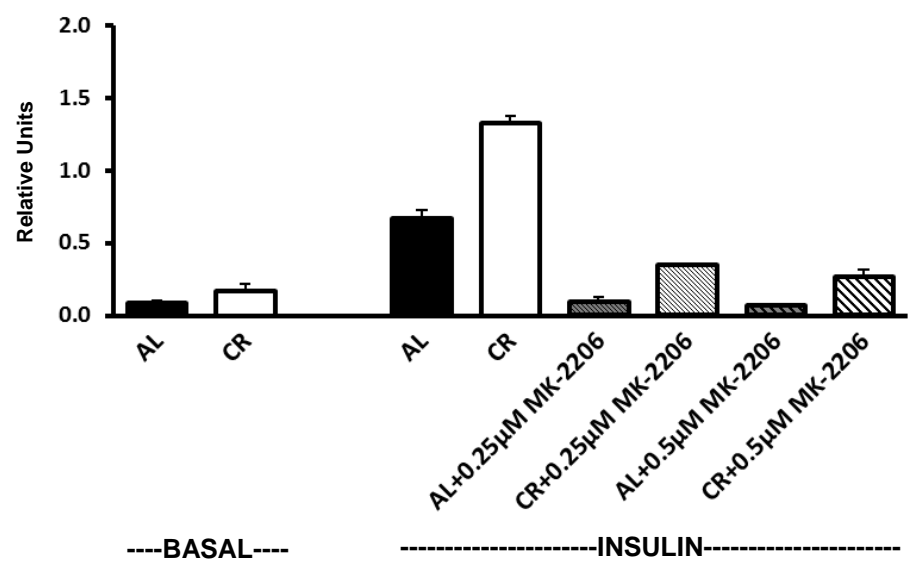

Supplement: NIHMS398102-supplement-04.pdf [file NIHMS398102-supplement-04.pdf]

Figure S5.

# pIR<sup>Tyr1162/1163</sup>

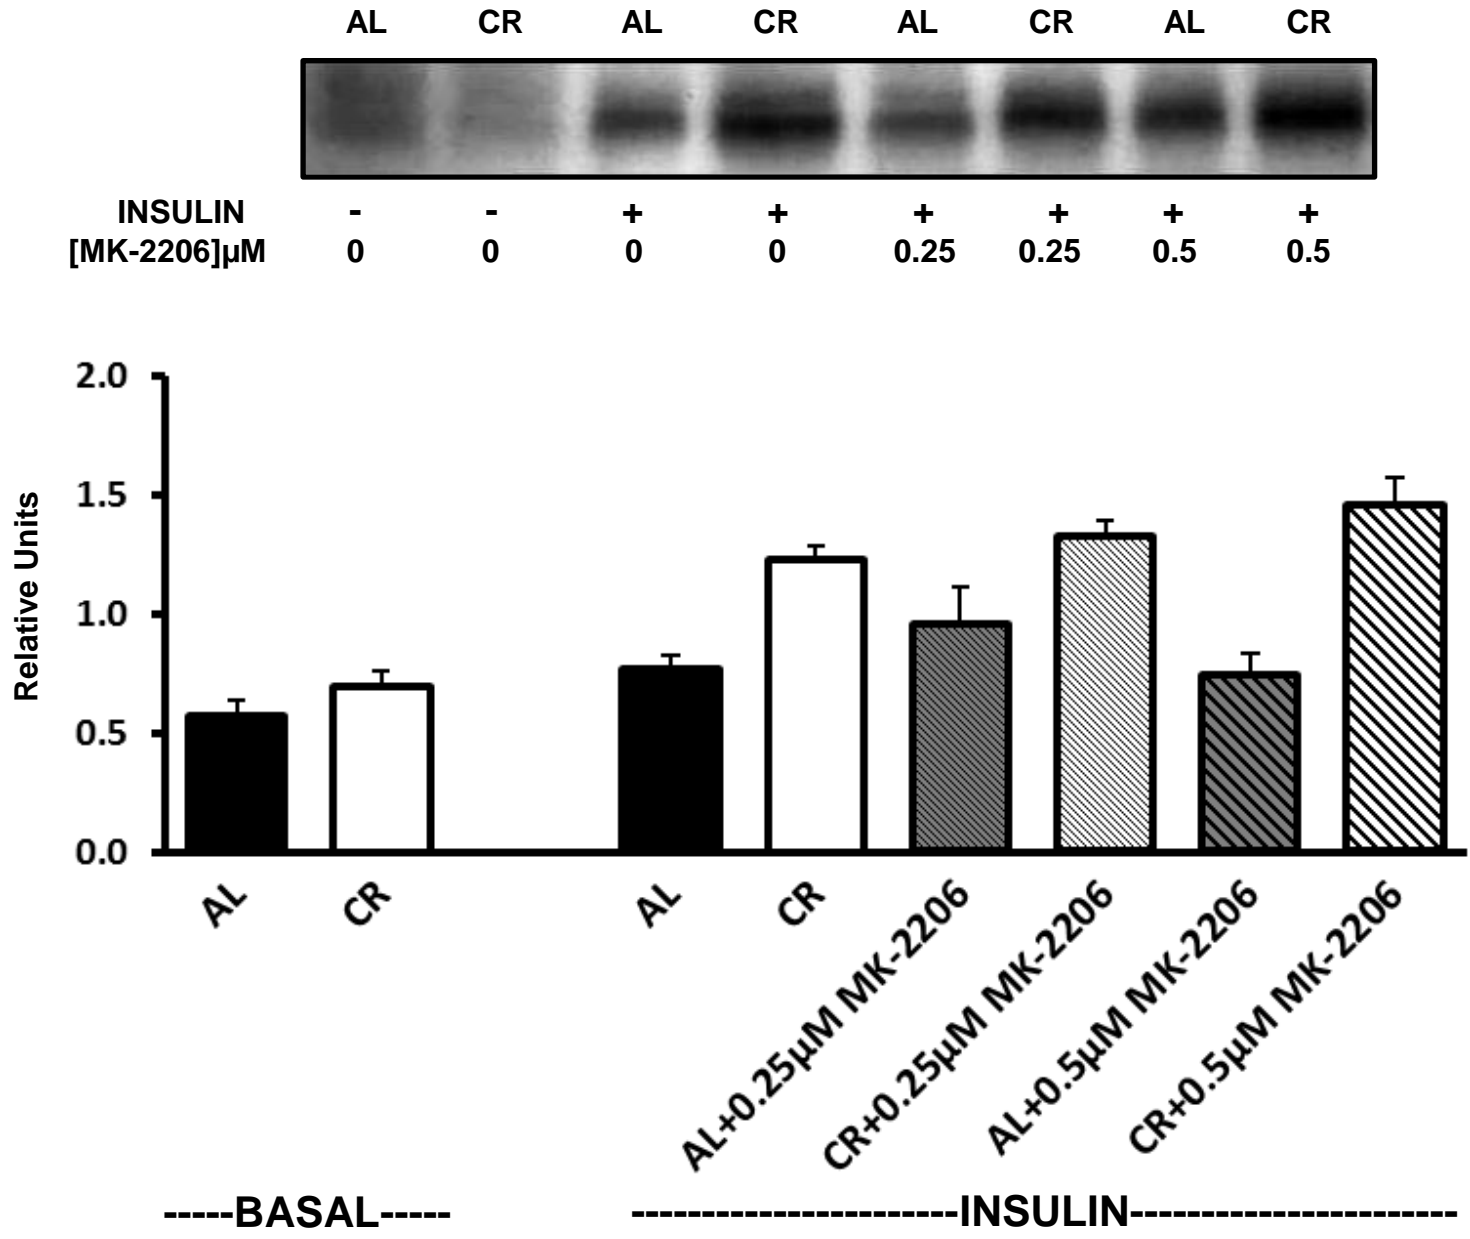

Supplement: NIHMS398102-supplement-05.pdf [file NIHMS398102-supplement-05.pdf]

Figure S6.

# 2-DG Uptake

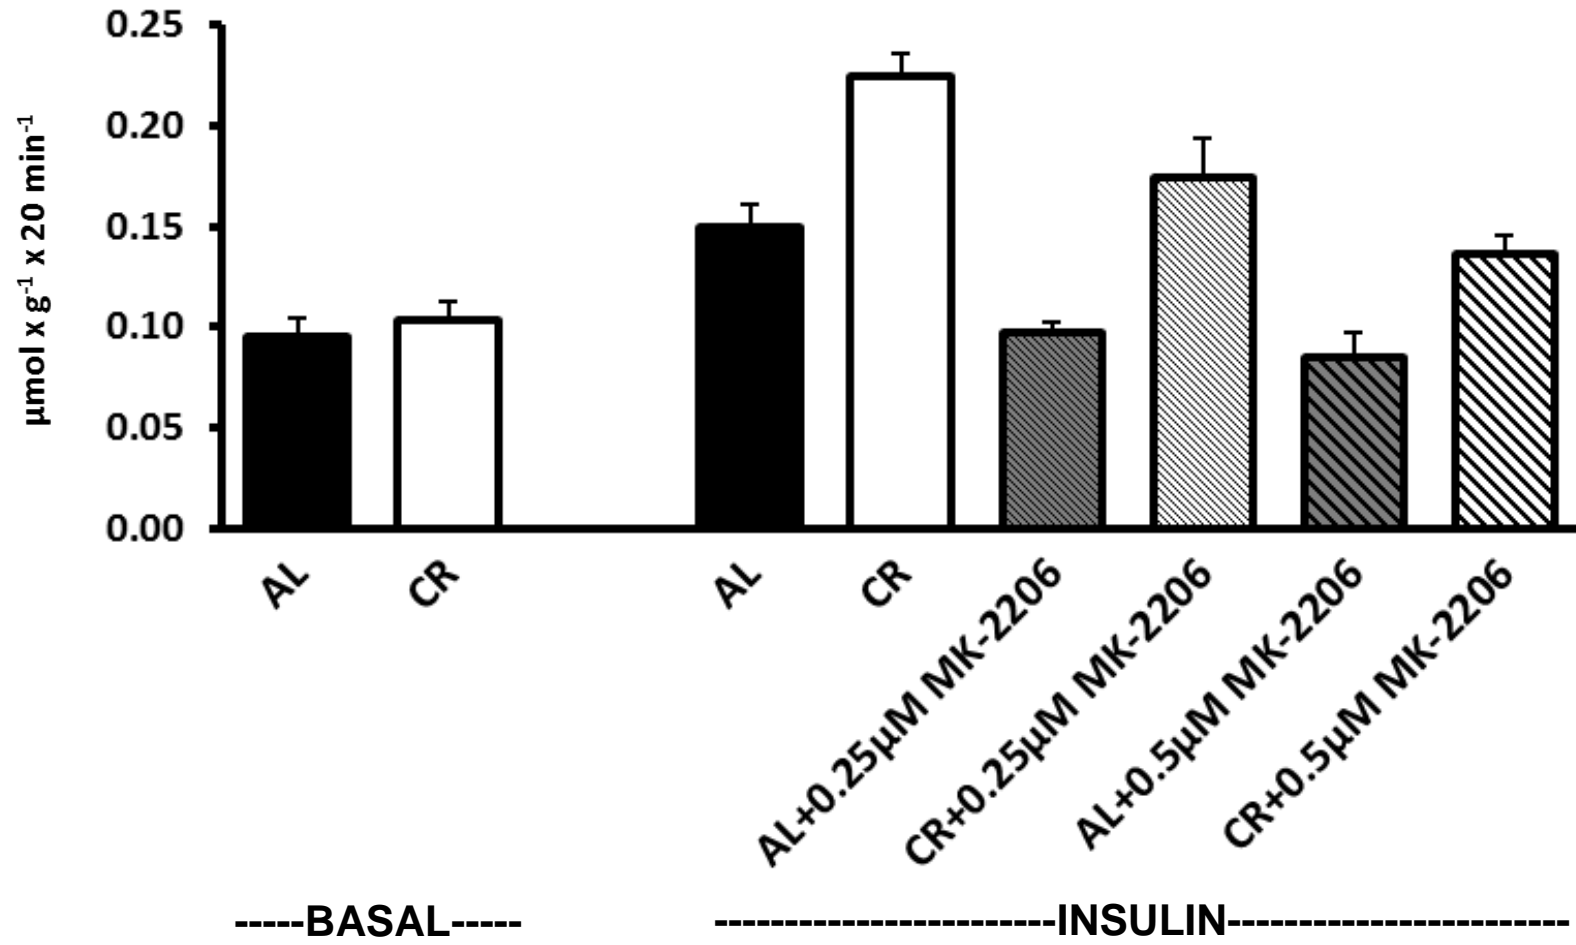

Supplement: NIHMS398102-supplement-06.pdf [file NIHMS398102-supplement-06.pdf]
